# Supplementary material for: Amplification-free detection of telomerase activity at the single-cell level via Cas12a-lighting-up single microbeads (Cas12a-LSMBs)
Source: Royal Society of Chemistry journal article supplement (doi:10.1039/d3lc00598d), 2023-01-01
Supplement: d3lc00598d1.pdf [file d3lc00598d1.pdf]

## Electronic Supplementary Information (ESI)

### **Amplification-free detection of telomerase activity at the single-cell level via Cas12a-lighting-up single microbead (Cas12a-LSMB)**

Honghong Wang,<sup>#a</sup> Shuhui Wang,<sup>#a</sup> Hui Wang,<sup>\*a</sup> Fu Tang,<sup>b</sup> Desheng Chen,<sup>a</sup> Yuanwen Liang,<sup>a</sup> and Zhengping Li<sup>\*a</sup>

<sup>a</sup> Beijing Key Laboratory for Bioengineering and Sensing Technology; School of Chemistry and Biological Engineering, University of Science and Technology Beijing, 30 Xueyuan Road, Haidian District, Beijing 100083, China

<sup>b</sup> School of Materials Science and Engineering, University of Science and Technology Beijing, 30 Xueyuan Road, Haidian District, Beijing 100083, China

## List of Contents:

|                                                                                               |    |
|-----------------------------------------------------------------------------------------------|----|
| 1. Experimental section.....                                                                  | 3  |
| 1.1 Materials and apparatus .....                                                             | 3  |
| 1.2 Cell culture and extraction of telomerase .....                                           | 4  |
| 1.3 Preparation of single-cell lysates .....                                                  | 5  |
| 1.4 Preparation of the single microbeads (SMBs).....                                          | 6  |
| 1.5 Functionalization of SMBs.....                                                            | 6  |
| 1.6 Homogeneous Cas12a assay.....                                                             | 6  |
| 1.7 Cas12a-LSMB-based telomerase activity assay.....                                          | 7  |
| 1.8 RQ-TRAP-based telomerase activity assay.....                                              | 7  |
| 2. Additional data.....                                                                       | 8  |
| 2.1 Optimization of experimental conditions for <i>trans</i> -cleavage of Cas12a assay .....  | 8  |
| 2.2 Evaluation of telomerase activity by using homogeneous Cas12a assay .....                 | 10 |
| 2.3 Detection of telomerase activities in the cell extracts .....                             | 11 |
| 2.4 Evaluation of telomerase activities in the cell extracts with RQ-TRAP assay.....          | 11 |
| 2.5 Telomerase activities analysis in human serum .....                                       | 12 |
| 2.6 Comparison of the performance of Cas12a-LSMB with other methods for telomerase analysis.. | 13 |
| 2.7 Detection of telomerase activities in individual cells.....                               | 17 |
| 2.8 Experimental data analysis of Cas12a-LSMB-based telomerase assay .....                    | 19 |

# 1. Experimental section

## 1.1 Materials

The Streptavidin Mag Sepharose microbeads (STV-MBs), which are highly cross-linked spherical agarose (Sepharose) containing magnetite and surface-coupled with STV through NHS, were obtained from Cytiva (Uppsala, Sweden). The CHAPS lysis buffer was bought from Millipore Co., Ltd (USA). The Triton X-100, JumpStart DNA polymerase, and 10 × PCR Buffer (100 mM Tris-HCl, 500 mM KCl, 15 mM MgCl<sub>2</sub>, 0.01% gelatin, pH 8.3) were bought from Sigam-Aldrich (Shanghai, China). Recombinant CRISPR-Cas12a protein (LbCas12a) was supplied by Editgene Co., Ltd, (Guangzhou, China). Recombinant RNase Inhibitor (RRI), dNTPs, and RNase-free water were supplied by TaKaRa Biotechnology Co. Ltd. (Dalian, China). 1 × PBS (137 mmol/L NaCl, 2.7 mmol/L KCl, 10 mmol/L Na<sub>2</sub>HPO<sub>4</sub>, 2 mmol/L KH<sub>2</sub>PO<sub>4</sub>, pH 7.4 at 25 °C) and 1 × PBST (1 × PBS with 0.05% tween-20) flowed from Sangon Biotech Co. Ltd. (Shanghai, China). 10 × NEBuffer 2.1 (100 mmol/L Tris-HCl, 500 mmol/L NaCl, 100 mmol/L MgCl<sub>2</sub>, 100 µg/mL BSA, pH 7.9 at 25°C) was purchased from New England BioLabs Inc. (Beijing, China). Telomerase substrate (TS or TSP), ACX primer, crRNA, off-target crRNA, TSE-9 DNA, off-target DNA, and Biotin-ssDNA reporter were custom synthesized and purified by Sangon Biotech (Shanghai, China). 20 × SYBR Green I (20 ng/µL stock solution in DMSO) was purchased from Xiamen Zhishan Biological Technology Co., Ltd. (Xiamen, China). All the reagents were of analytical grade and were used as received without further purification. The sequences of the oligonucleotides were given in Table S1. The HeLa, HL-60, NB4, MCF-7, A549, and MRC-5 cell lines were purchased from the National Collection of Authenticated Cell Cultures (Shanghai, China).

**Table S1.** Sequences of the oligonucleotides used in this work.

| Name                      | Sequence ( 5'-3' direction )                                                                                                  |
|---------------------------|-------------------------------------------------------------------------------------------------------------------------------|
| Telomerase substrate (TS) | AATCCGTCGAGCAGAGTT                                                                                                            |
| TSE-DNA crRNA             | UAAUUUCUACUAAGUGUAGAU <u>CCCUAACCCUAACCCUAACC</u>                                                                             |
| Off-target crRNA          | UAAUUUCUACUAAGUGUAGAU <u>UGAAGUAGAUUAUGGCAGCAC</u>                                                                            |
| TSE-9                     | AATCCGTCGAGCAGAGTTTTAGGGTTAGGGTTAGGGTTAGGGTT<br>AGGGTTAGGGTTAGGGTAAGGGTTAGGG<br>CGTAAATGCACTTGCTTCAGGACCATATTTCTCTACACCTTTTTT |
| Off-target ssDNA          | AGGATGCTTTGTTTCAGGTGTATCAACCAATAATAGTCTGAATGT<br>CATTGGTTGACC                                                                 |
| TS primer (TSP)           | AATCCGTCGAGCAGAGTT                                                                                                            |
| ACX                       | GCGCGGCTTACCCTTACCCTTACCCTAACC                                                                                                |
| Biotin-ssDNA reporter     | 6-FAM-/IBI ODT/TATTATATT-BHQ1                                                                                                 |

Notes: The letter /IBI ODT/ indicates the Biotin modification at the T.

## 1.2 Cell culture and extraction of telomerase

The MRC-5 (Human embryonic lung fibroblasts cell), NB4 (Human acute promyelocytic leukemia cell), A549 (Human non-small cell lung cancer cell line), HL-60 (Human acute promyelocytic leukemia cell) cell lines were cultivated in 5 mL RPMI 1640 Medium (Sangon Biotech) contains 10% (v/v) fetal bovine serum, 1.5 g/L NaHCO<sub>3</sub>, 2.5 g/L glucose, 0.11 g/L Sodium Pyruvate. HeLa (Human cervical cancer cell) and MCF-7 cells (Human breast ductal carcinoma cell line) were cultured in the DMEM Medium (Sangon Biotech), and it includes 10% (v/v) fetal bovine serum (Sangon Biotech), 1% NaHCO<sub>3</sub>, 100 U/mL penicillin, 100 mg/mL streptomycin, and 3 mmol/L L-glutamine. All of the cell lines were cultured at 37 °C and the CO<sub>2</sub> content in humid air was 5%.

After digesting the cultured Hela cells or other cells with trypsin (0.2% trypsin, 1 mmol/L EDTA, Invitrogen), all cells were centrifuged at 1000 rpm for 5 minutes and then removed medium. The cells were washed with cold D-PBS buffer (10 mmol/L sodium phosphate buffer, 0.1 mol NaCl, pH 7.4 at 25 °C), accurately counted by a blood counting chamber, and then centrifuged to obtain aggregated cells. Each cell pellet was resuspended in an appropriate volume of CHAPS cell lysis buffer (10 mmol/L Tris-HCl, pH 7.5, 1 mmol/L MgCl<sub>2</sub>, 1 mmol/L EGTA, 0.1 mmol/L PMSF, 5 mmol/L mercaptoethanols, 0.5% CHAPS, 10% glycerol), in which ensures the cell concentration is 10<sup>4</sup> cells/μL, placed on ice for 30 minutes, and then centrifuged at 12,000 rpm at 4 °C for 20 minutes. The upper layer cell extracts

containing telomerase were divided and stored in an ultra-low temperature refrigerator at -80 °C. The telomerase extracts are appropriately diluted with CHAPS lysis buffer as a sample for telomerase activity detection.

### 1.3 Preparation of single-cell lysates

To obtain a single cell, we continuously diluted the above cell suspension to 1 cell/ $\mu$ L. 1  $\mu$ L of the diluted cell suspension was transferred to the hydrophobic 96-well plate cover, and then one cell was accurately aspirated utilizing a micromanipulation system equipped with a monitor. Finally, 1 cell was dropped into 1  $\mu$ L of cold Triton X-100 (0.2%) solution to lysate for 5 min, and its telomerase activity was immediately detected as the sample.

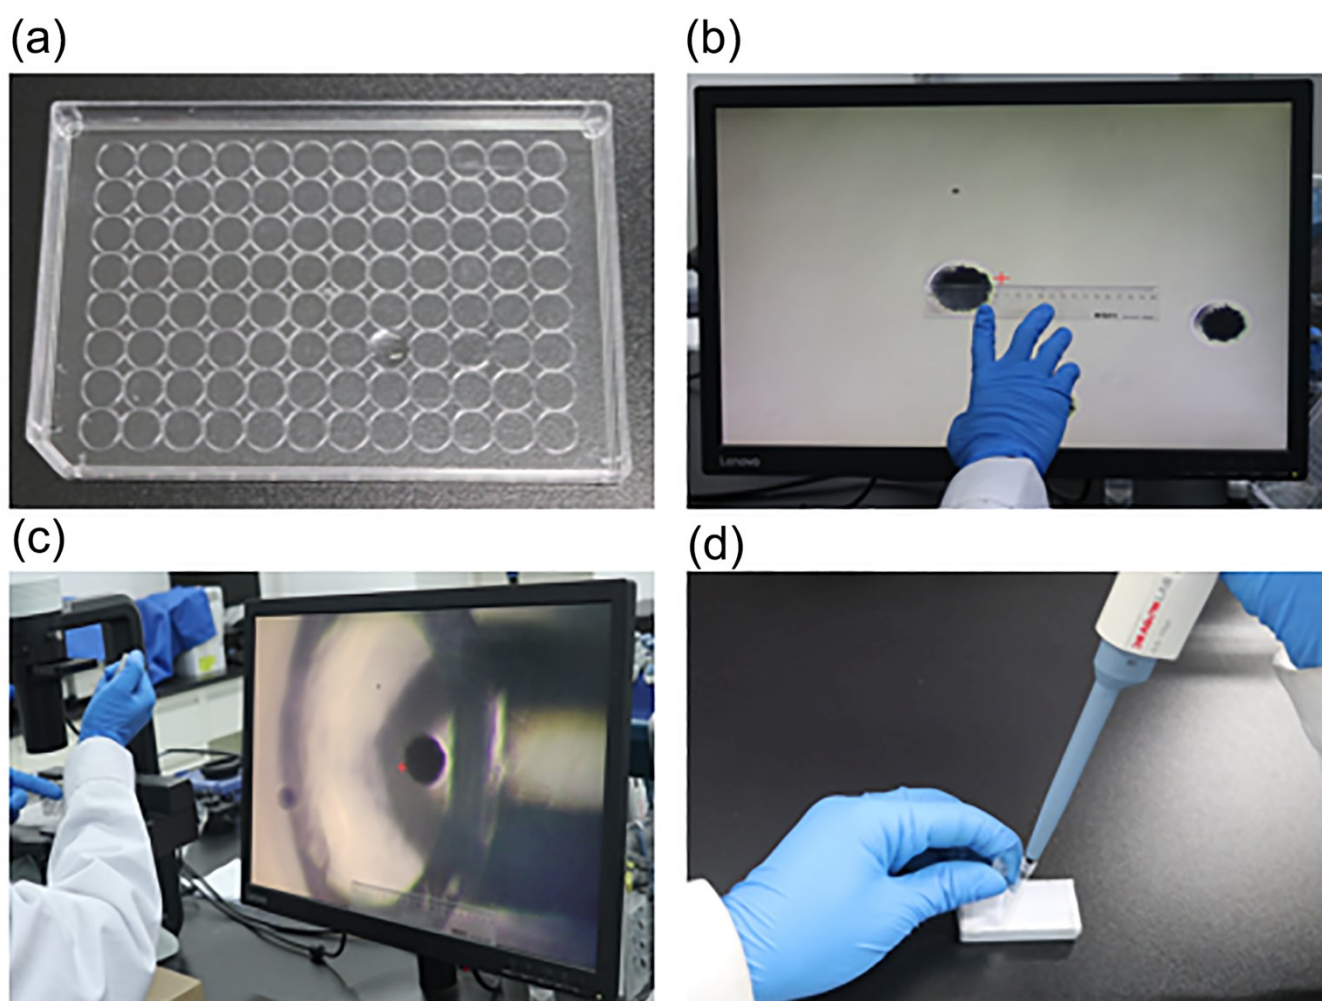

**Fig. S1.** Illustration of the capturing process of a single STV-MB.

## 1.4 Preparation of the single microbeads (SMBs)

Typically, 50  $\mu$ L of PBST solution suspended with hundreds of STV-MBs was dropped onto a transparent hydrophobic 96-well plate cover to assist and capture individual MB (Fig. S1a). A DIY micromanipulation system, an Olympus IX53 inverted microscope equipped with a monitor was used to operate individual STV-MBs. With the help of the monitor, we can search the suitable MBs on the monitor with the naked eye. A ruler was employed to help us select the beads with the desired diameter size (a diameter of  $\sim 6$  cm on the monitor and the actual diameter is  $\sim 80$   $\mu$ m). Once the desired SMB was selected, we only needed a pipette to capture and transfer it to a PCR tube (Fig. S1d). To ensure the reproducibility of the Cas12a-LSMB-based telomerase assay, the size of the selected STV-MBs was strictly controlled at  $80 \pm 5$   $\mu$ m.

## 1.5 Functionalization of SMBs

Place a single SMB in a PCR tube containing 9.5  $\mu$ L PBS, add 0.5  $\mu$ L Biotin-ssDNA reporter (50  $\mu$ mol/L), and oscillate for one hour at room temperature. Then, the SMB was washed three times by magnetic separation to remove the excess probes for use.

## 1.6 Homogeneous Cas12a assay

Real-time fluorescence detection manner: 10  $\mu$ L of the homogeneous Cas12a reaction mixture was prepared with 100 nM-1600 nM Cas12a, 50 nM-800 nM TSE DNA-crRNA, 500 nM Biotin-FQ-ssDNA reporter, 1 $\times$  NEBuffer 2.1, and 1 nM TSE-9. Before adding TSE-9 DNA, all reaction mixtures were incubated at 37°C for 10 min to form the crRNA/Cas12a complex. The fluorescence of the bulk Cas12a assay was real-time monitored by Step-One Real-Time Thermal Cycler (Thermal Fisher Scientific) at 20 °C-55 °C for 60 min.

Endpoint fluorescence detection manner: 100  $\mu$ L of the homogeneous Cas12a reaction mixture was prepared with 400 nM Cas12a, 200 nM TSE DNA-crRNA, 500 nM Biotin-FQ-ssDNA reporter, 1 $\times$  NEBuffer 2.1, and cell extracts. Before adding cell extracts, all reaction mixtures were incubated at 37°C for 10 min to form the crRNA/Cas12a complex. The mixture solution was incubated at 37 °C for 60 min to perform the *trans*-cleavage reaction of Cas12a. Then, 100  $\mu$ L 1  $\times$  PBS was added to the reaction solution, and the fluorescence spectra were measured on an F-7000 fluorescence spectrophotometer (Hitachi, Japan).

## 1.7 Cas12a-LSMB-based telomerase activity assay

### (1) Telomerase reverse transcriptional extension reaction

5  $\mu$ L reaction mixture containing 1  $\times$  telomerase reverse transcriptional extension buffer (20 mM Tris HCl, 1.5 mM MgCl<sub>2</sub>, 63 mM KCl, 1 mM EGTA, 0.05% Tween-20, pH 8.3), 4 U RNase inhibitor (RRI), 500  $\mu$ M dNTPs, 10 nM telomerase substrate (TS), and various cell samples (including cell extracts, or heating-treated cell extracts, or single cell lysates) were incubated at 37 °C for 60 min (30 min for RQ-TRAP assay) to obtain the telomerase extension product and then incubated at 95 °C for 5 min to inactivate the telomerase.

### (2) *Trans*-cleavage reaction of the CRISPR/Cas12a system

5  $\mu$ L reaction mixture (containing 400 nM LbCas12a protein, 200 nM TSE-DNA crRNA, and 2  $\times$  NEBuffer 2.1 (20 mM Tris-HCl, 100 mM NaCl, 20 mM MgCl<sub>2</sub>, 2  $\mu$ g/mL BSA), and Functionalized-SMB) was added into the telomerase reverse transcription extension mixture (5  $\mu$ L). Then the reaction mixture (10  $\mu$ L) was incubated at 37 °C for 60 min under gentle oscillation to complete the *trans*-cleavage reaction of the CRISPR/Cas12a system.

### (3) Fluorescence imaging

After the reaction, the reaction solution was removed. Then, the Functionalized-SMB was washed twice with 200  $\mu$ L PBST and resuspended in 5  $\mu$ L of PBS. Subsequently, fluorescence imaging of the individual Functionalized-SMB was obtained on TCS-SP8 confocal fluorescence microscopy (Leica) by collecting the fluorescence at the wavelength range from 500 nm to 570 nm under the excitation of a 488 laser.

## 1.8 RQ-TRAP-based telomerase activity assay

5  $\mu$ L of the telomerase reverse transcription extension mixture was added to 15  $\mu$ L of the TRAP assay solution, which contains 1  $\times$  PCR Buffer (10 mM Tris-HCl, 50 mM KCl, 1.5 mM MgCl<sub>2</sub>, 0.001% gelatin, pH 8.3), 1  $\times$  SYBR Green I, 1 U JumpStart Taq DNA polymerase, 250 nM TS primer, 250 nM ACX primer, and 500  $\mu$ M dNTPs. The PCR was performed using a Step-One Real-Time Thermal Cycler (Thermal Fisher Scientific) with the following procedure: 94°C for 2 min; 40 cycles at 94°C for 20 s, 50°C for 30 s, and 72°C for 90 s.

## 2. Additional data

### 2.1 Optimization of experimental conditions for *trans*-cleavage of Cas12a assay

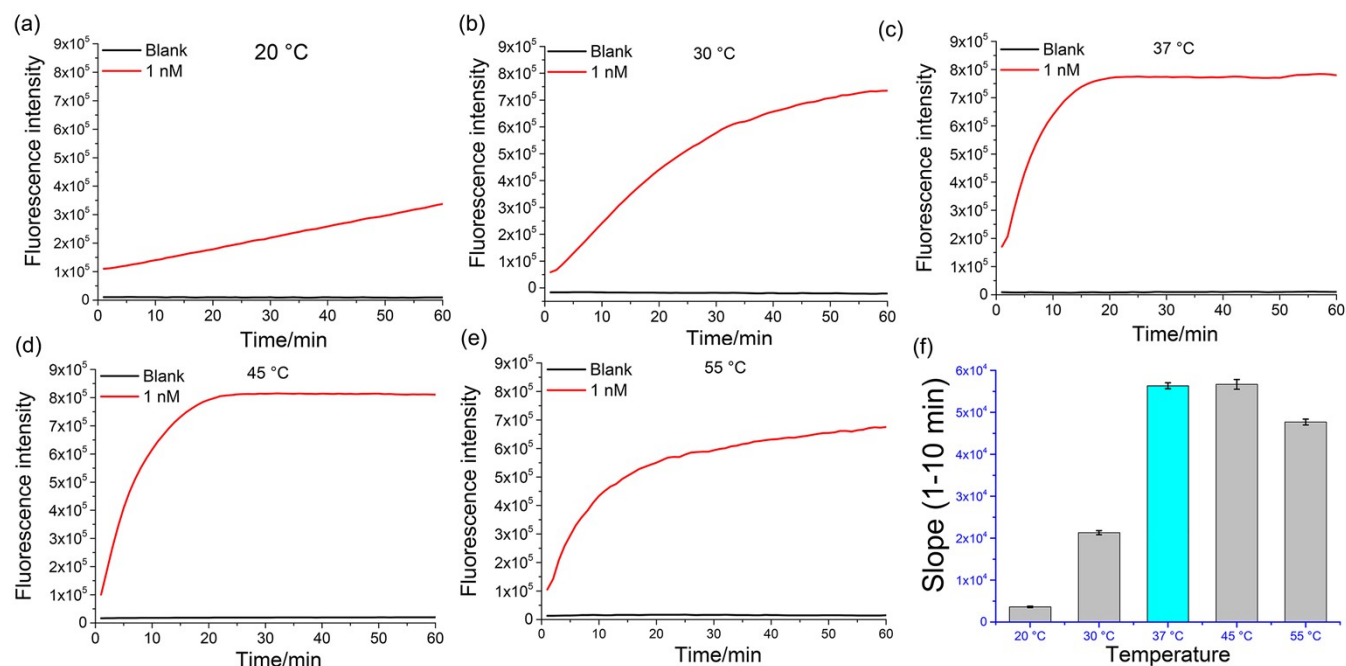

**Fig. S2** Effect of the reaction temperature on *trans*-cleavage efficiency of Cas12a. (a-e) Real-time fluorescence curves of Cas12a *trans*-cleavage initiated by 1 nM TSE-9 DNA at different temperatures, including 20 °C (a), 30 °C (b), 37 °C (c), 45 °C (d), and 55 °C (e). (f) The slope of real-time fluorescence curves (1-10 min) produced by 1 nM TSE-9 DNA. Other conditions: TSE-DNA crRNA, 200 nM; Cas12a protein, 400 nM. Error bars show the standard deviations of three repeated experiments.

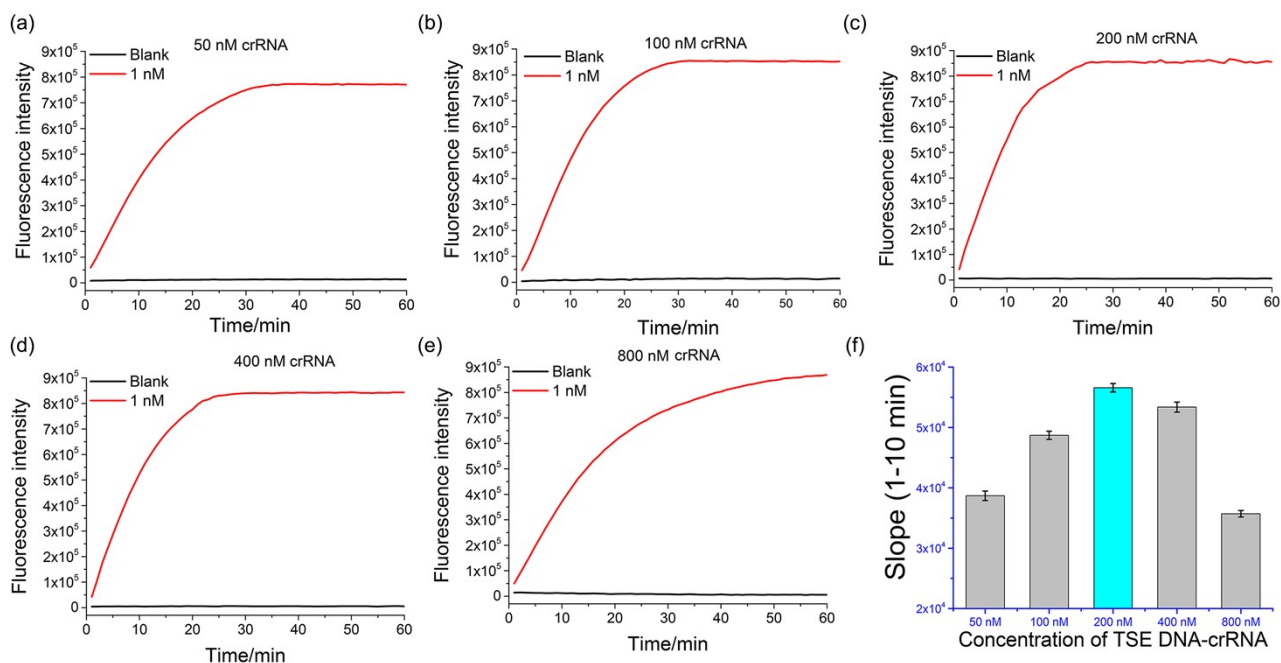

**Fig. S3** Influence of the TSE-DNA crRNA concentration on *trans*-cleavage efficiency of Cas12a. (a-e) Real-time fluorescence curves of Cas12a *trans*-cleavage initiated by 1 nM TSE-9 DNA at different concentrations of TSE-DNA crRNA, including 50 nM (a), 100 nM (b), 200 nM (c), 400 nM (d), and 800 nM (e). (f) The slope of real-time fluorescence curves (1-10 min) produced by 1 nM TSE-9 DNA. Other conditions: Cas12a protein, 400 nM; reaction temperature, 37 °C. Error bars show the standard deviations of three repeated experiments.

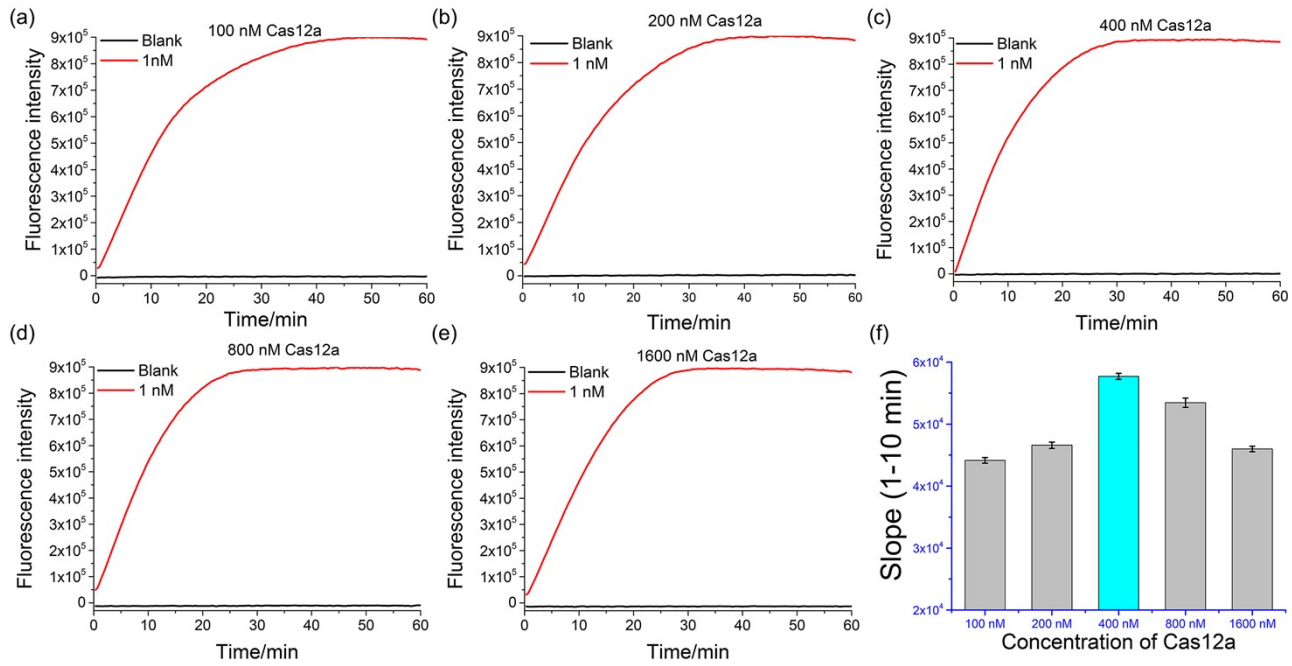

**Fig. S4** Effect of the Cas12a protein concentration on *trans*-cleavage efficiency of Cas12a. (a-e) Real-time fluorescence curves of Cas12a *trans*-cleavage initiated by 1 nM TSE-9 DNA at different concentrations of Cas12a protein, including 100 nM (a), 200 nM (b), 400 nM (c), 800 nM (d), and 1600 nM (e). (f) The slope of real-time fluorescence curves (1-10 min) produced by 1 nM TSE-9 DNA. Other conditions: TSE-DNA crRNA, 200 nM; reaction temperature, 37 °C. Error bars show the standard deviations of three repeated experiments.

## 2.2 Evaluation of telomerase activity by using homogeneous Cas12a assay

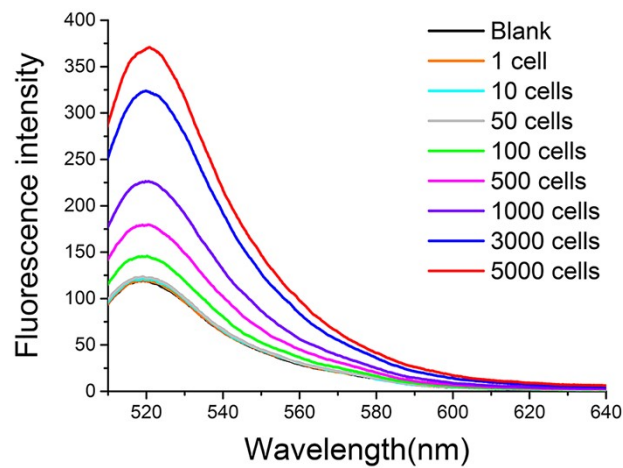

**Fig. S5** Evaluating the telomerase activity in different numbers of HeLa cell extracts by using the endpoint fluorescence homogeneous Cas12a assay. Experimental conditions: TSE DNA-crRNA, 200 nM; Cas12a protein, 400 nM; Telomerase self-extension reaction time, 60 min; *Trans*-cleavage reaction time, 60 min; Telomerase self-extension and *Trans*-cleavage reaction temperature, 37°C.

### 2.3 Detection of telomerase activities in the cell extracts

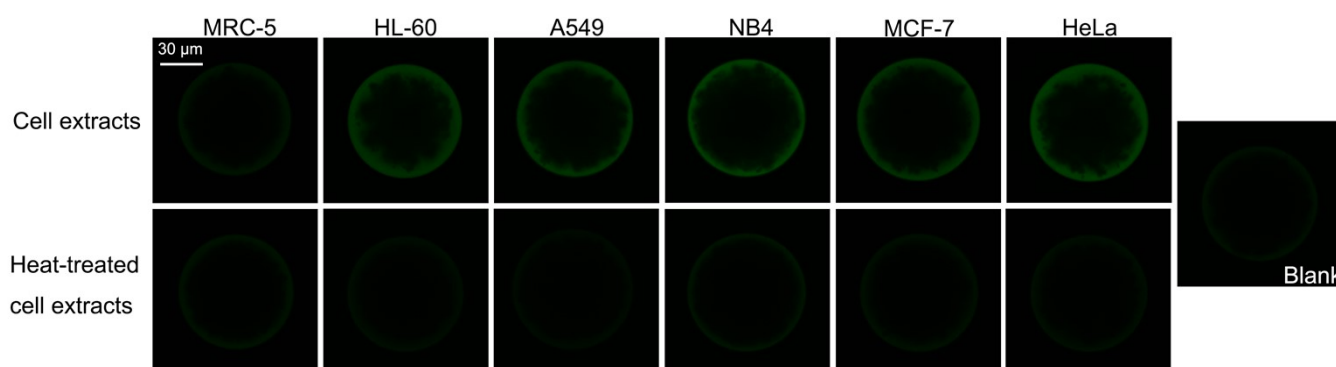

**Fig. S6** Detection of telomerase activity in cell extracts and heat-treated cell extracts (10 cells) from different cell lines, including MRC-5, HL-60, A549, NB4, MCF-7, and HeLa.

### 2.4 Evaluation of telomerase activities in the cell extracts with RQ-TRAP assay

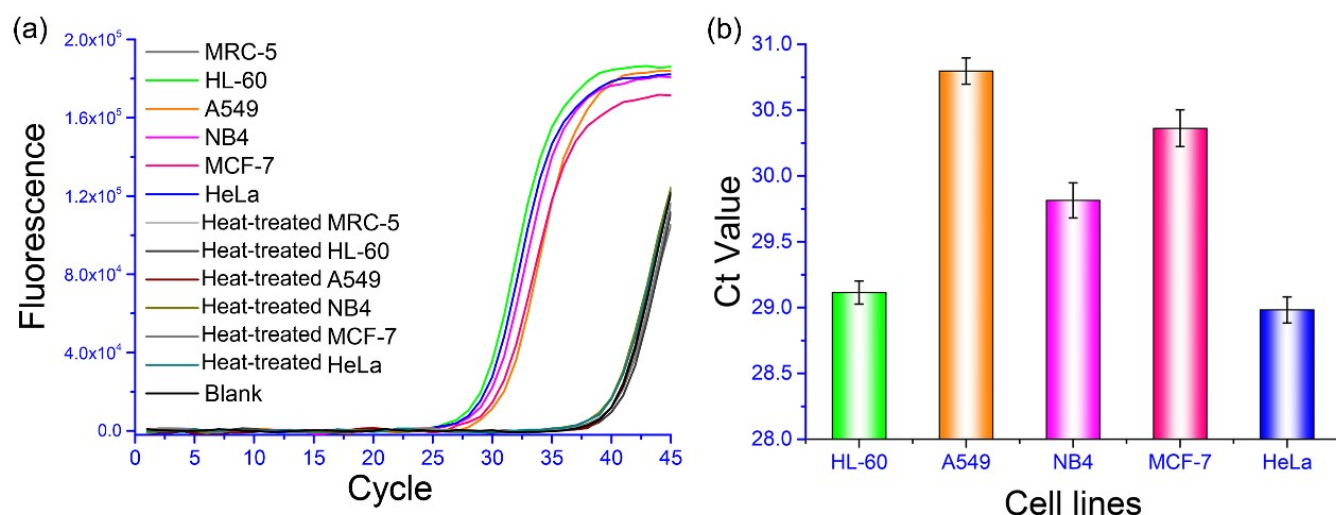

**Fig. S7** Evaluation of telomerase activities in the cell extracts with RQ-TRAP assay. (a) Real-time fluorescence curves produced by 10 cell equivalent extracts and heat-treated extracts from different cell lines. (b) Ct value of real-time fluorescence curves generated by 10 cell equivalent extracts from HL-60, A549, NB4, MCF-7, and HeLa.

## 2.5 Telomerase activities analysis in human serum

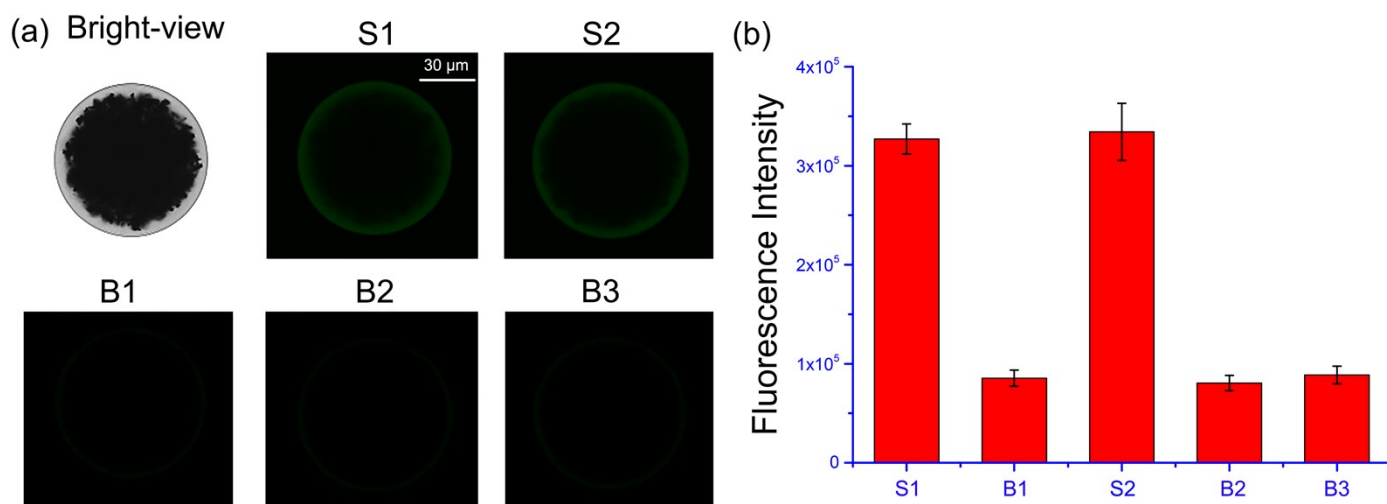

**Fig. S8** Telomerase activity analysis in Human Serum by using Cas12a-LSMB. (a) Fluorescence images of SMBs produced by different samples. (B) The adopted fluorescence intensity of the SMB images. The left-top image in (a) is the bright-view image of the individual SMB. S1: 10 HeLa cell equivalent extracts; S2: 10 HeLa cell equivalent extracts-spiked serum (0.2  $\mu$ L) sample; B1: CHAPS buffer; B2: Serum; B3: 10 HeLa cell equivalent heat-treated extracts-spiked serum (0.2  $\mu$ L) sample. Error bars show the standard deviations of three repeated experiments from the same samples.

## 2.6 Detection of telomerase activities in individual cells

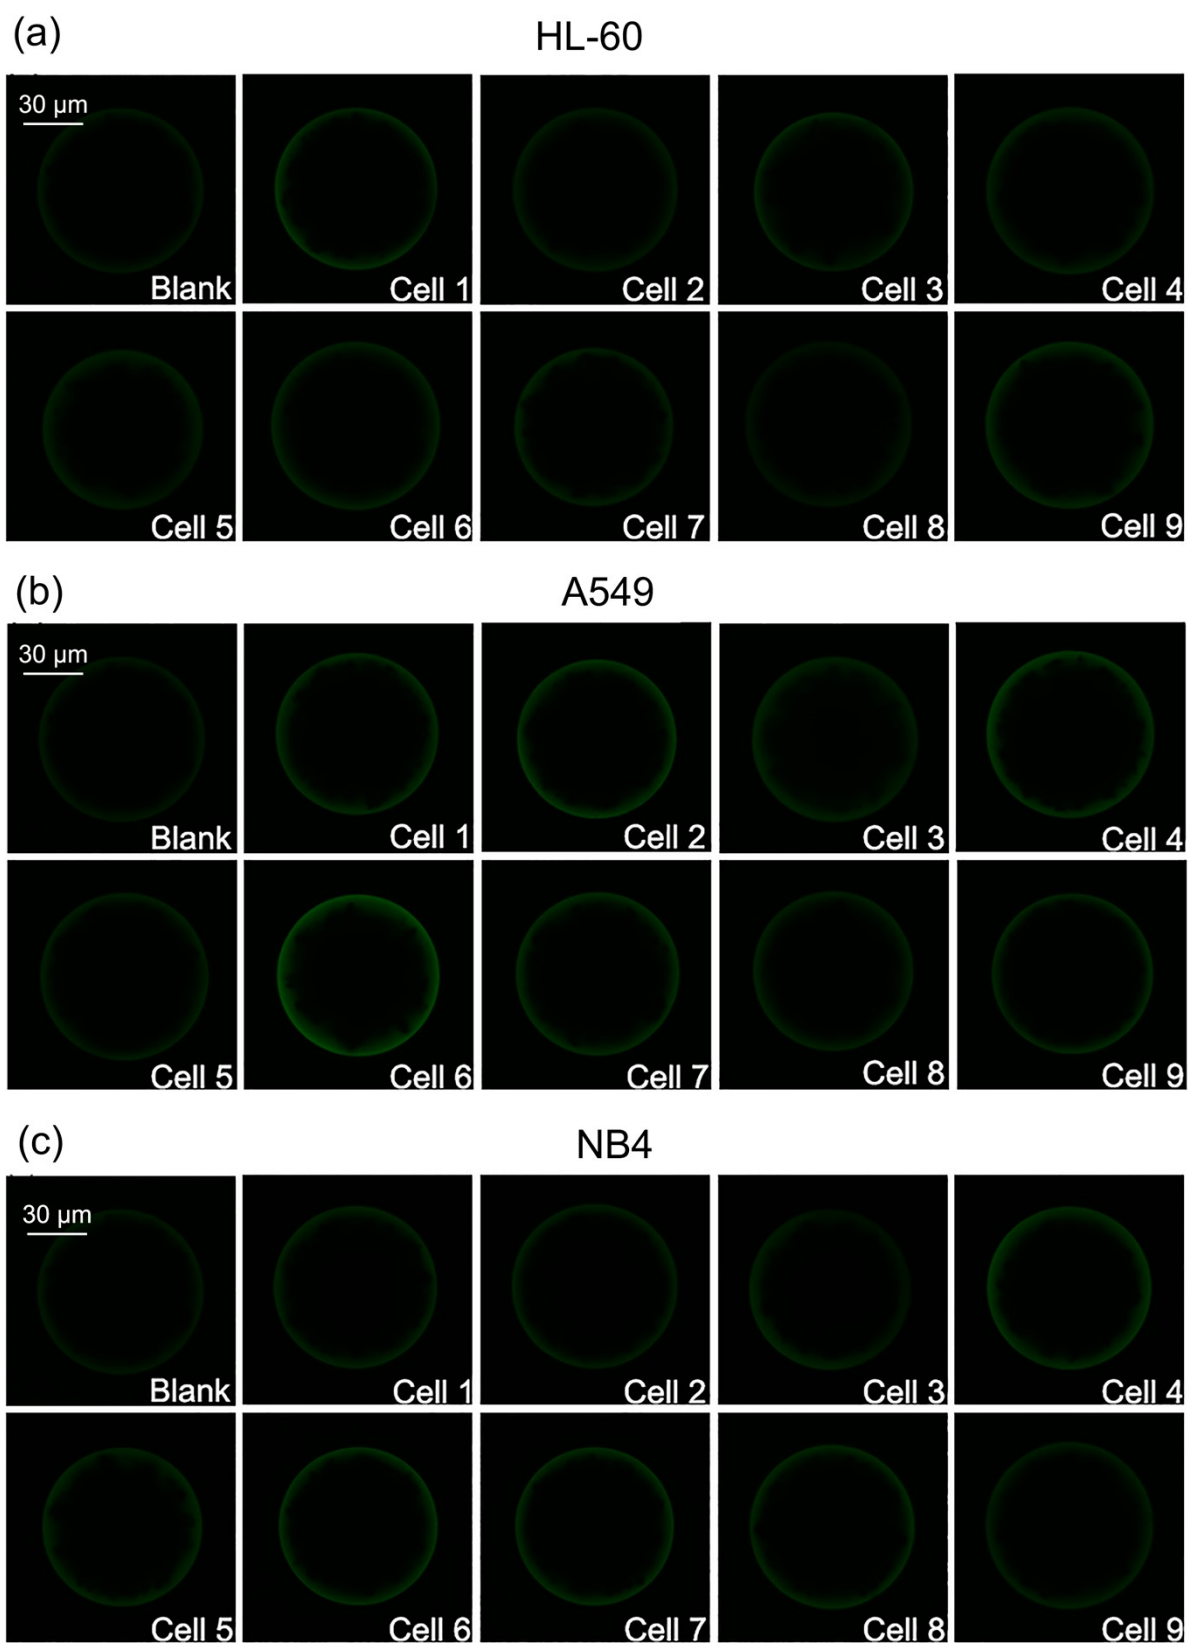

**Fig. S9** Telomerase activity assay in individual cells. (a) HL-60, (b) A549, and (c) NB4.

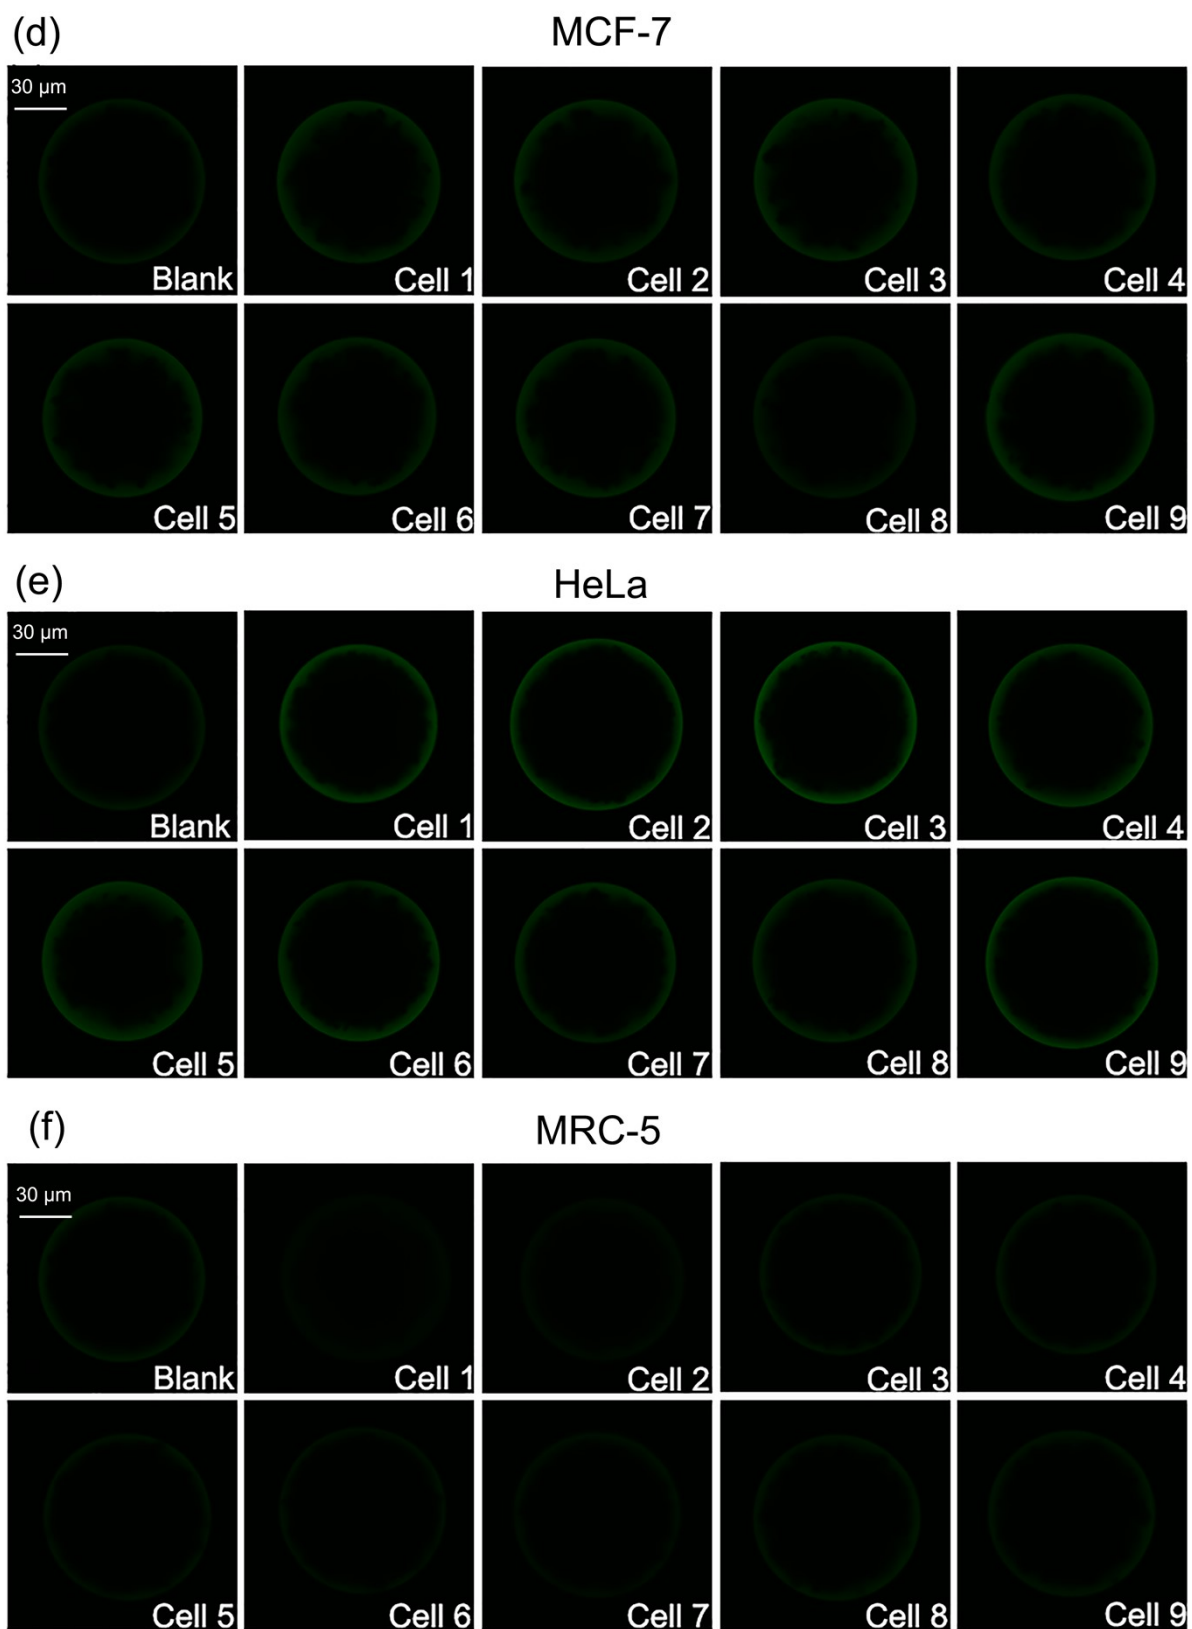

**Fig. S9** Telomerase activity assay in individual cells. (d) MCF-7, (e) HeLa, and (f) MRC-5.

## 2.7 Comparison of the performance of Cas12a-LSMB with other methods for telomerase analysis

**Table S2.** Comparison of the performance of Cas12a-LSMB with other methods for telomerase analysis.

| Method                  | Probe design and numbers | Amplification | Preparation process and time of sensors | Processes and temperature of basic measurement                                    | Analysis time | Sensitivity | Signal output          | Ref    |
|-------------------------|--------------------------|---------------|-----------------------------------------|-----------------------------------------------------------------------------------|---------------|-------------|------------------------|--------|
| Real-time TRAP          | Simple, 2                | PCR           | No need                                 | Self-extension, 25°C; Thermal cycles                                              | 150 min       | 1 cell      | Real-time fluorescence | [1, 2] |
| RCA                     | Complex, 3               | RCA           | No need                                 | Pre-Hybridization, 95°C and 37°C; Self-extension, 37°C; ligation, 16°C; RCA 30 °C | 7 h           | 1 cell      | Fluorescence           | [3]    |
| 3WJ-EXPAR               | Complex, 3               | EXPAR         | No need                                 | Self-extension 30°C; Hybridization, 37°C; EXPAR 55 °C                             | 180 min       | 3 cells     | Fluorescence           | [4]    |
| EXPAR                   | Complex, 2               | EXPAR         | No need                                 | Self-extension 37°C; EXPAR 55 °C                                                  | 30-60 min     | 1 cell      | Fluorescence           | [5,6]  |
| SPEA                    | Complex, 4               | LAMP          | No need                                 | Self-extension 37°C; LAMP 65 °C                                                   | 100 min       | 1 cell      | Real-time fluorescence | [7]    |
| HCR                     | Complex, 4               | HCR           | Complex, > 24 h                         | Self-extension 37°C; Hybridization, room temperature; HCR, room temperature       | 4 h           | 2 cells     | Electrochemical        | [8]    |
| Electrochemistry sensor | Complex, 3               | CHA           | Complex, ~ 60 h                         | Self-extension 37°C; incubation and CHA, 37°C                                     | ~250 min      | 100 cells   | Electrochemical        | [9]    |
| Smart DNA Tweezer       | Complex, 4               | SDA           | Simple, < 10 min                        | Self-extension 37°C; Telomerase inactivated 95°C; SDA 37°C                        | ~ 12 h        | 280 cells   | Fluorescence           | [10]   |

|                             |            |         |                  |                                                                              |          |                                                           |                                      |           |
|-----------------------------|------------|---------|------------------|------------------------------------------------------------------------------|----------|-----------------------------------------------------------|--------------------------------------|-----------|
| PCR-free fluorescence assay | Complex, 4 | No need | Simple, < 10min  | Self-extension 30°C; Telomerase inactivated 95°C; SDA 37°C                   | 110 min  | 5 cells                                                   | Fluorescence                         | [11]      |
| Nanoparticles-based assay   | Simple, 2  | No need | Complex, ~ 24 h  | Self-extension 30°C; Telomerase inactivated 95°C; Hybridization              | ~ 70 min | 100 cells                                                 | Color or UV-Vis spectra              | [12]      |
| SPR assay                   | Simple, 2  | No need | Complex, > 24 h  | Self-extension 38°C                                                          | ~65 min  | 18 cells                                                  | SPR spectra                          | [13]      |
| One-pot Cas12a assay        | Simple, 2  | No need | No need          | One step 37°C                                                                | 60 min   | 100 cells                                                 | Fluorescence                         | [14]      |
| Two-step Cas12a assay       | Simple, 2  | No need | No need          | Self-extension 37°C; Telomerase inactivated 95°C; Trans-cleave reaction 37°C | 155 min  | 5 cells                                                   | Fluorescence                         | [15]      |
| pcDNA Cas12a assay          | Complex, 3 | No need | No need          | Self-extension 37°C; Trans-cleave reaction 37°C                              | 180 min  | 10 cells ( <i>in vitro</i> ) or 1 cell ( <i>in vivo</i> ) | Fluorescence or Fluorescence imaging | [16]      |
| Cas12a-LSMB                 | Simple, 2  | No need | Simple, ~ 60 min | Self-extension 37°C; Telomerase inactivated 95°C; Trans-cleave reaction 37°C | 125 min  | 1 cell                                                    | Fluorescence imaging                 | This work |

## 2.8 Experimental data analysis of Cas12a-LSMB-based telomerase assay

**Table S3** Experimental data analysis of Cas12a-LSMB-based telomerase assay

| Cell Number | Cell Line | Average | SD    | SD/Average   | Fig     |
|-------------|-----------|---------|-------|--------------|---------|
| 1 cell      | HeLa      | 183266  | 11093 | 0.061        | Fig. 4b |
| 10 cells    | HeLa      | 354244  | 15166 | 0.043        | Fig. 4b |
| 100 cells   | HeLa      | 557706  | 17935 | 0.032        | Fig. 4b |
| 500 cells   | HeLa      | 655312  | 30920 | 0.047        | Fig. 4b |
| 1000 cells  | HeLa      | 804679  | 28458 | 0.035        | Fig. 4b |
| 10 cells    | MRC-5     | 107520  | 8856  | 0.082        | Fig. 4c |
| 10 cells    | HL-60     | 328149  | 12626 | 0.038        | Fig. 4c |
| 10 cells    | A549      | 276787  | 8282  | 0.030        | Fig. 4c |
| 10 cells    | NB4       | 321356  | 9368  | 0.029        | Fig. 4c |
| 10 cells    | MCF-7     | 296750  | 10243 | 0.035        | Fig. 4c |
| 10 cells    | Hela      | 333775  | 8926  | 0.027        | Fig. 4c |
| 10 cells    | MRC-5     | 99857   | 8795  | 0.088        | Fig. 4c |
| 10 cells    | HL-60     | 101694  | 10599 | 0.104        | Fig. 4c |
| 10 cells    | A549      | 90287   | 9821  | 0.109        | Fig. 4c |
| 10 cells    | NB4       | 103102  | 10484 | 0.102        | Fig. 4c |
| 10 cells    | MCF-7     | 102000  | 9829  | 0.096        | Fig. 4c |
| 10 cells    | Hela      | 95851   | 9980  | 0.104        | Fig. 4c |
|             | Blank     | 88157   | 8625  | 0.098        | Fig. 4c |
| 1 cell      | MRC-5     | 83438   | 8657  | 0.104        | Fig. 5  |
| 1 cell      | HL-60     | 131169  | 17879 | <b>0.136</b> | Fig. 5  |
| 1 cell      | A549      | 152613  | 23545 | <b>0.154</b> | Fig. 5  |
| 1 cell      | NB4       | 135977  | 22178 | <b>0.163</b> | Fig. 5  |
| 1 cell      | MCF-7     | 158614  | 23171 | <b>0.146</b> | Fig. 5  |
| 1 cell      | HeLa      | 178342  | 26847 | <b>0.151</b> | Fig. 5  |

## Reference:

- [1] Hou, M.; Xu, D.; Björkholm, M.; Gruber, A. Real-time quantitative telomeric repeat amplification protocol assay for the detection of telomerase activity<sup>2</sup>. *Clinical Chemistry*, **2001**, 47: 519-524.
- [2] Wege, H.; Chui, M. S.; Le, H. T.; Tran, J. M.; Zern, M. A. Sybr green real-time telomeric repeat amplification protocol for the rapid quantification of telomerase activity. *Nucleic Acids Research*, **2003**, 31: E3.
- [3] Li, X.; Cui, Y.; Du, Y.; Tang, A.; Kong, D. Label-free telomerase detection in single cell using a five-base telomerase product-triggered exponential rolling circle amplification strategy. *ACS Sensors*, **2019**, 4: 1090-1096.
- [4] Zhao, Y.; Qi, L.; Chen, F.; Zhao, Y.; Fan, C. Highly sensitive detection of telomerase activity in tumor cells by cascade isothermal signal amplification based on three-way junction and base-stacking hybridization. *Biosensors and Bioelectronics*, **2013**, 41: 764-770.
- [5] Tian, L.; Weizmann, Y. Real-time detection of telomerase activity using the exponential isothermal amplification of telomere repeat assay. *Journal of the American Chemical Society*, **2013**, 135: 1661-1664.
- [6] Wang, L. J.; Zhang, Y.; Zhang, C. Y. Ultrasensitive detection of telomerase activity at the single-cell level. *Analytical Chemistry*, 2013, 85: 11509-11517.
- [7] Wang, H. H.; Wang, H.; Liu, C. H.; Duan, X. R.; Li, Z. P. Ultrasensitive detection of telomerase activity in a single cell using stem-loop primer-mediated exponential amplification (SPEA) with near zero nonspecific signal. *Chemical Science*, **2016**, 7: 4945-4950.
- [8] Wang, W. J.; Li, J. J.; Rui, K.; Gai, P. P.; Zhang, J. R.; Zhu, J. J. Sensitive electrochemical detection of telomerase activity using spherical nucleic acids gold nanoparticles triggered mimic-hybridization chain reaction enzyme-free dual signal amplification. *Analytical Chemistry*, **2015**, 87: 3019-3026.
- [9] Ling, P.; Lei, J.; Ju, H. Nanoscaled porphyrinic metal-organic frameworks for electrochemical detection of telomerase activity via telomerase triggered conformation switch. *Analytical Chemistry*, **2016**, 88: 10680-10686.
- [10] Xu, X.; Wang, L.; Li, K.; Huang, Q.; Jiang, W. A smart DNA tweezer for detection of human telomerase activity. *Analytical Chemistry*, **2018**, 90: 3521-3530.

- [11] Zhang, X.; Cheng, R.; Shi, Z.; Jin, Y. A PCR-free fluorescence strategy for detecting telomerase activity via double amplification strategy. *Biosensors and Bioelectronics*, **2016**, 75: 101-107.
- [12] Wang, J.; Wu, L.; Ren, J.; Qu, X. Visual detection of telomerase activity with a tunable dynamic range by using a gold nanoparticle probe-based hybridization protection strategy. *Nanoscale*, **2014**, 6: 1661-1666.
- [13] Sharon, E.; Freeman, R.; Riskin, M.; Gil, N.; Tzfati, Y.; Willner, I. Optical, electrical and surface plasmon resonance methods for detecting telomerase activity. *Analytical Chemistry*, **2010**, 82: 8390-8397.
- [14] Yu, P.; Yang, T.; Zhang, D.; Xu, L.; Cheng, X.; Ding, S.; Cheng, W. An all-in-one telomerase assay based on CRISPR-cas12a trans-cleavage while telomere synthesis. *Analytica Chimica Acta*, **2021**, 1159: 338404.
- [15] Wang, H.; Wang, S.; Wang, H.; Liang, Y.; Li, Z. Sensitive and amplification-free detection of telomerase activity by self-extension of telomerase and trans-cleavage of CRISPR/CCas12a. *Talanta*, **2023**, 253.
- [16] Chen, S.; Wang, R.; Peng, S.; Xie, S.; Lei, C.; Huang, Y.; Nie, Z. Pam-less conditional DNA substrates leverage trans-cleavage of CRISPR-Cas12a for versatile live-cell biosensing. *Chemical Science*, **2022**, 13: 2011-2020.
